# Supplementary material for: Effective Coping with Academic Stress Is a Matter of Personality Types: Revisiting the Person-Centred Approach
Source: MDPI journal article supplement (doi:10.3390/bs13080687), 2023-08-18
Supplement: s1 [file s1]

## Supplementary Material

**Table S1.** Reliability Indexes of Internal Consistency, Cronbach's  $\alpha$ , and McDonald's  $\omega$  for the Coping Strategies Inventory (CSI) and the NEO-FFI.

| Scale   | Dimension               | $\omega$ | 95% CI      | $\alpha$ | 95% CI      |
|---------|-------------------------|----------|-------------|----------|-------------|
| NEO-FFI | Neuroticism             | .90      | [.89 - .91] | .89      | [.88 - .90] |
|         | Extraversion            | .90      | [.89 - .91] | .90      | [.89 - .91] |
|         | Openness                | .79      | [.77 - .81] | .79      | [.76 - .81] |
|         | Agreeableness           | .74      | [.71 - .77] | .73      | [.71 - .76] |
|         | Conscientiousness       | .88      | [.87 - .90] | .88      | [.87 - .89] |
| CSI     | Problem-Solving         | .88      | [.87 - .90] | .88      | [.87 - .90] |
|         | Self-Criticism          | .91      | [.90 - .92] | .91      | [.90 - .92] |
|         | Emotional Expression    | .87      | [.85 - .88] | .86      | [.84 - .87] |
|         | Wishful Thinking        | .84      | [.82 - .86] | .83      | [.81 - .85] |
|         | Social Support          | .81      | [.78 - .83] | .80      | [.78 - .83] |
|         | Cognitive Restructuring | .85      | [.83 - .87] | .85      | [.83 - .86] |
|         | Problem Avoidance       | .72      | [.69 - .75] | .71      | [.68 - .74] |
|         | Social Withdrawal       | .78      | [.75 - .80] | .78      | [.75 - .80] |
